# Supplementary material for: Single-cell RNA sequencing reveals functional heterogeneity of glioma-associated brain macrophages
Source: Nat Commun. 2021 Feb 19;12:1151. doi: 10.1038/s41467-021-21407-w (PMC7895824; doi:10.1038/s41467-021-21407-w)
Supplement: Supplementary file 1 — Supplementary Information [file 41467_2021_21407_MOESM1_ESM.pdf]

Supplementary information

---

## **Single-cell RNA sequencing reveals functional heterogeneity of glioma-associated brain macrophages**

Natalia Ochocka<sup>1#</sup>, Pawel Segit<sup>1#</sup>, Kacper Adam Walentynowicz<sup>1</sup>, Kamil Wojnicki<sup>1</sup>, Salvador Cyranowski<sup>1,2</sup>, Julian Swatler<sup>3</sup>, Jakub Mieczkowski<sup>1\*</sup>, Bozena Kaminska<sup>1\*</sup>

[b.kaminska@nencki.edu.pl](mailto:b.kaminska@nencki.edu.pl)

[j.mieczkowski@nencki.edu.pl](mailto:j.mieczkowski@nencki.edu.pl)

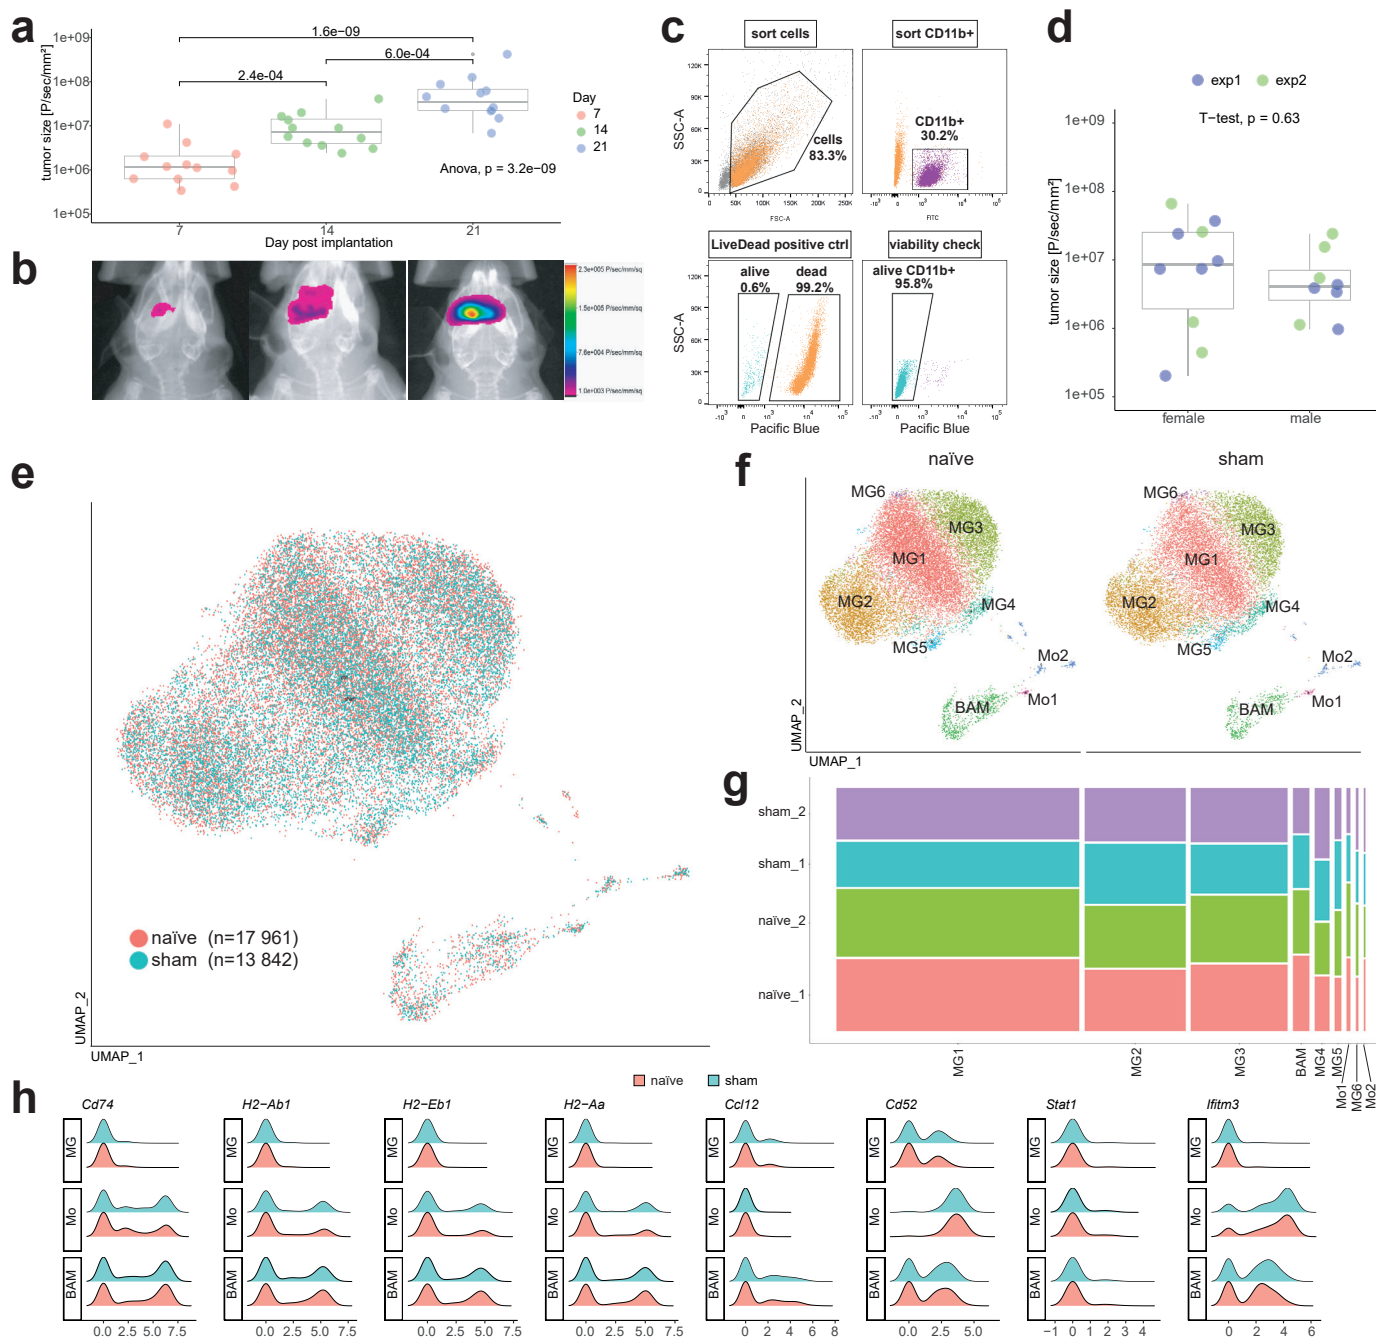

### Supplementary Figure 1. Animal model characterization.

**(a)** Quantification of bioluminescence tumor imaging at 7, 14 and 21 day post-implantation. One-way ANOVA and Tukey's HSD post hoc test, the lower and upper hinges of the boxplots correspond to 25th and 75th percentile, whiskers range from -1.5 IQR to 1.5 IQR and a bar in the center of the box represents a median value,  $n=12$  animals per time point.

**(b)** Representative tumor images (tumors for which the bioluminescent signal was closest to the median value in a given time point).

**(c)** CD11b<sup>+</sup> sorting strategy with labelling for live/dead cell showing high viability of sorted cells, with positive control for dead cells.

**(d)** Quantification of bioluminescence tumor imaging male vs female animals for two experiments: exp1- animals sacrificed for scRNA-seq and cytometry measurements, exp2 – animals sacrificed for immunohistochemistry staining. Two-sided t-test, the lower and upper hinges of the boxplots correspond to 25th and 75th percentile, whiskers range from -1.5 IQR to 1.5 IQR and a bar in the center of the box represents median value,  $n=12$  for female and  $n=10$  for male.

**(e-h)** Single-cell RNA-seq for CD11b<sup>+</sup> cells sorted from brains of naive and sham-implanted animals. **(e)** UMAP shows uniform distribution of cells from naive and sham-implanted animals. **(f)** UMAPs demonstrating that all obtained clusters were present for both naive and sham condition **(g)** Proportion of cells from naive and sham-implanted animals was comparable across all obtained clusters. **(h)** Expression level of genes showing upregulation in Act-MG compared to Hom-MG (Figure 4c), was not changed in sham-implanted compared to control animals.

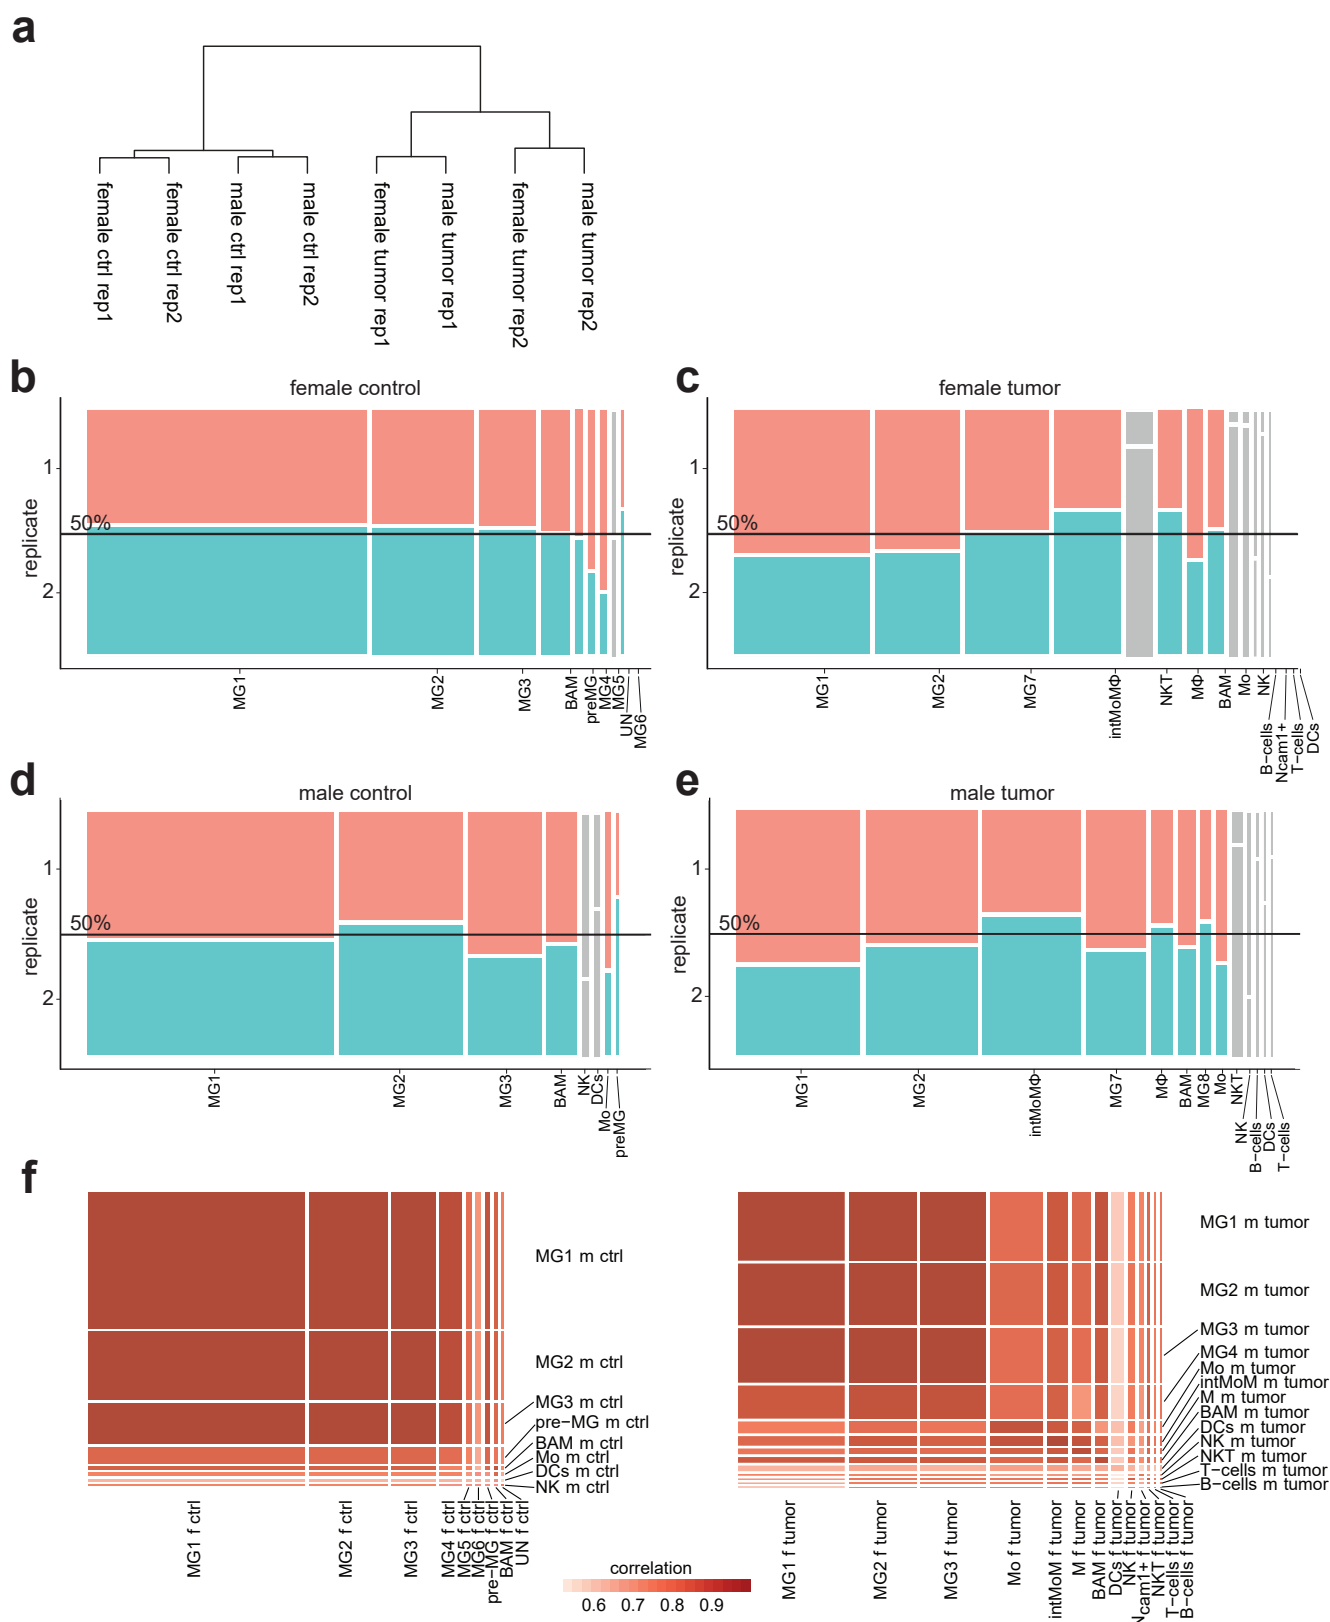

**Supplementary Figure 2. Comparison of the scRNA-seq replicates.**

(a) Dendrogram showing results of unsupervised hierarchical clustering of pseudo-bulk gene expression profiles of each sample. (b-e) Percentage of cells from 2 replicates in clusters for (b) female control, (c) female tumor, (d) male control, (e) male tumor. Width of the each bar corresponds to the size of the cluster. Clusters that were selected for further analysis (Figure 2a) are in red and blue, the other clusters are in grey. (f) Correlation heatmaps comparing gene expression profiles of the identified clusters between sexes. Right and Left heatmap correspond to control and tumor samples respectively. Width and height of the cell represents fraction of cells joint into the corresponding cluster.

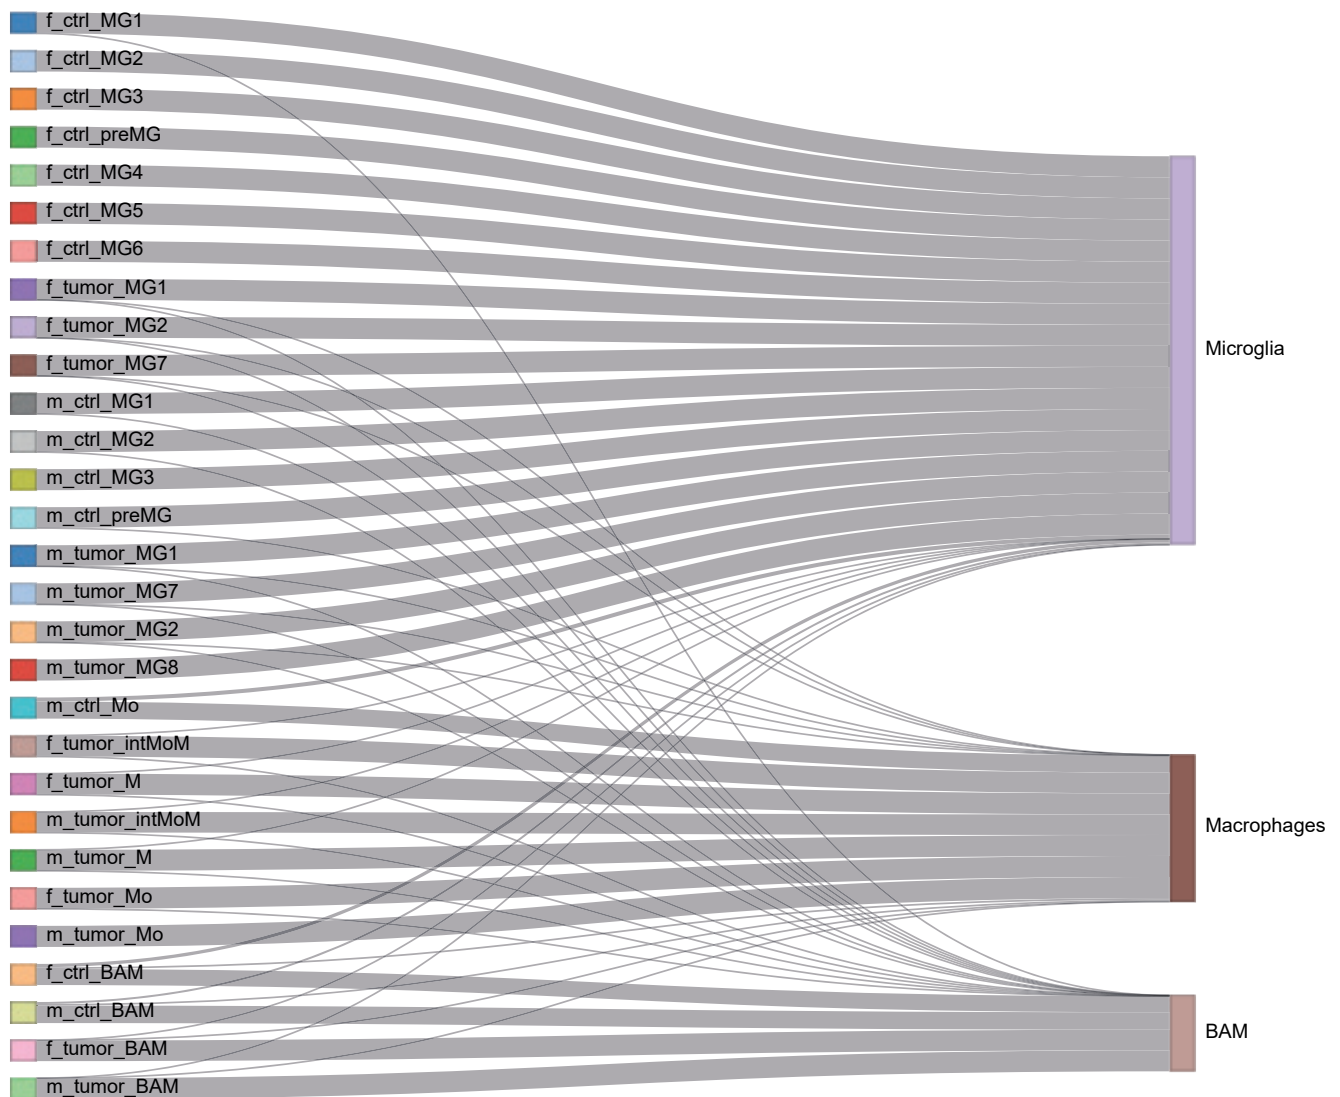

**Supplementary Figure 3. Distribution of the identified clusters across Microglia, Macrophages and BAMs clusters.** Flow diagram illustrating how cells from clusters obtained in analysis of each condition separately (Figure 1a) have transferred to clusters identified as Microglia, Macrophages, BAMs (Figure 2a), after merging selected cells from all samples into one dataset. Width of each link is proportional to the fraction of cells that have transferred from clusters on the left to clusters on the right side of the plot.

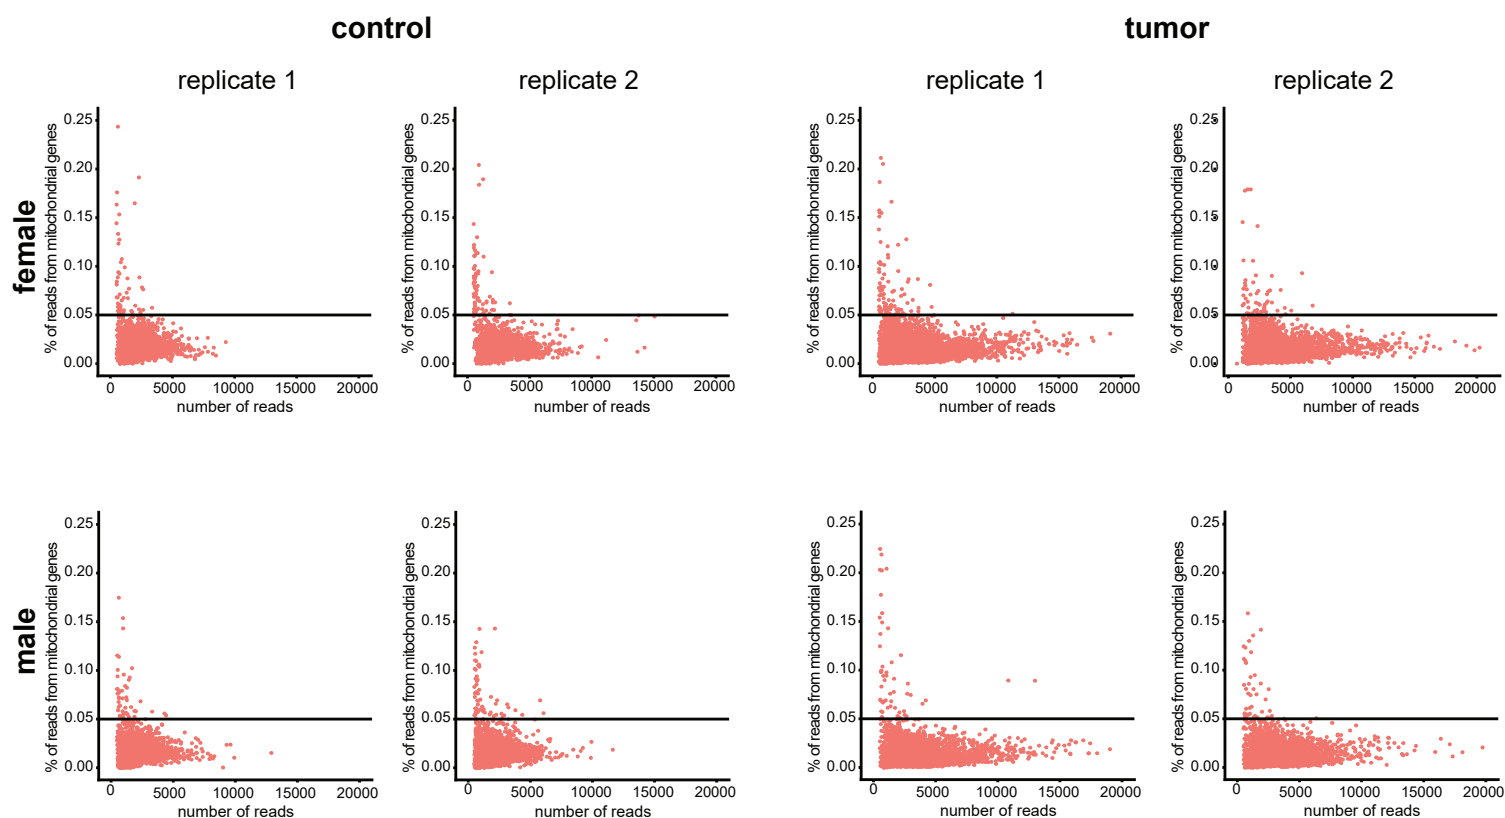

#### Supplementary Figure 4. Percentage of the mitochondrial reads across samples.

Scatter plots visualizing percentage of the reads aligned to mitochondrial genes (Y axis) compared to the total number of reads (X axis). Each dot corresponds to individual cell. The figure is organized as Figure 1b.

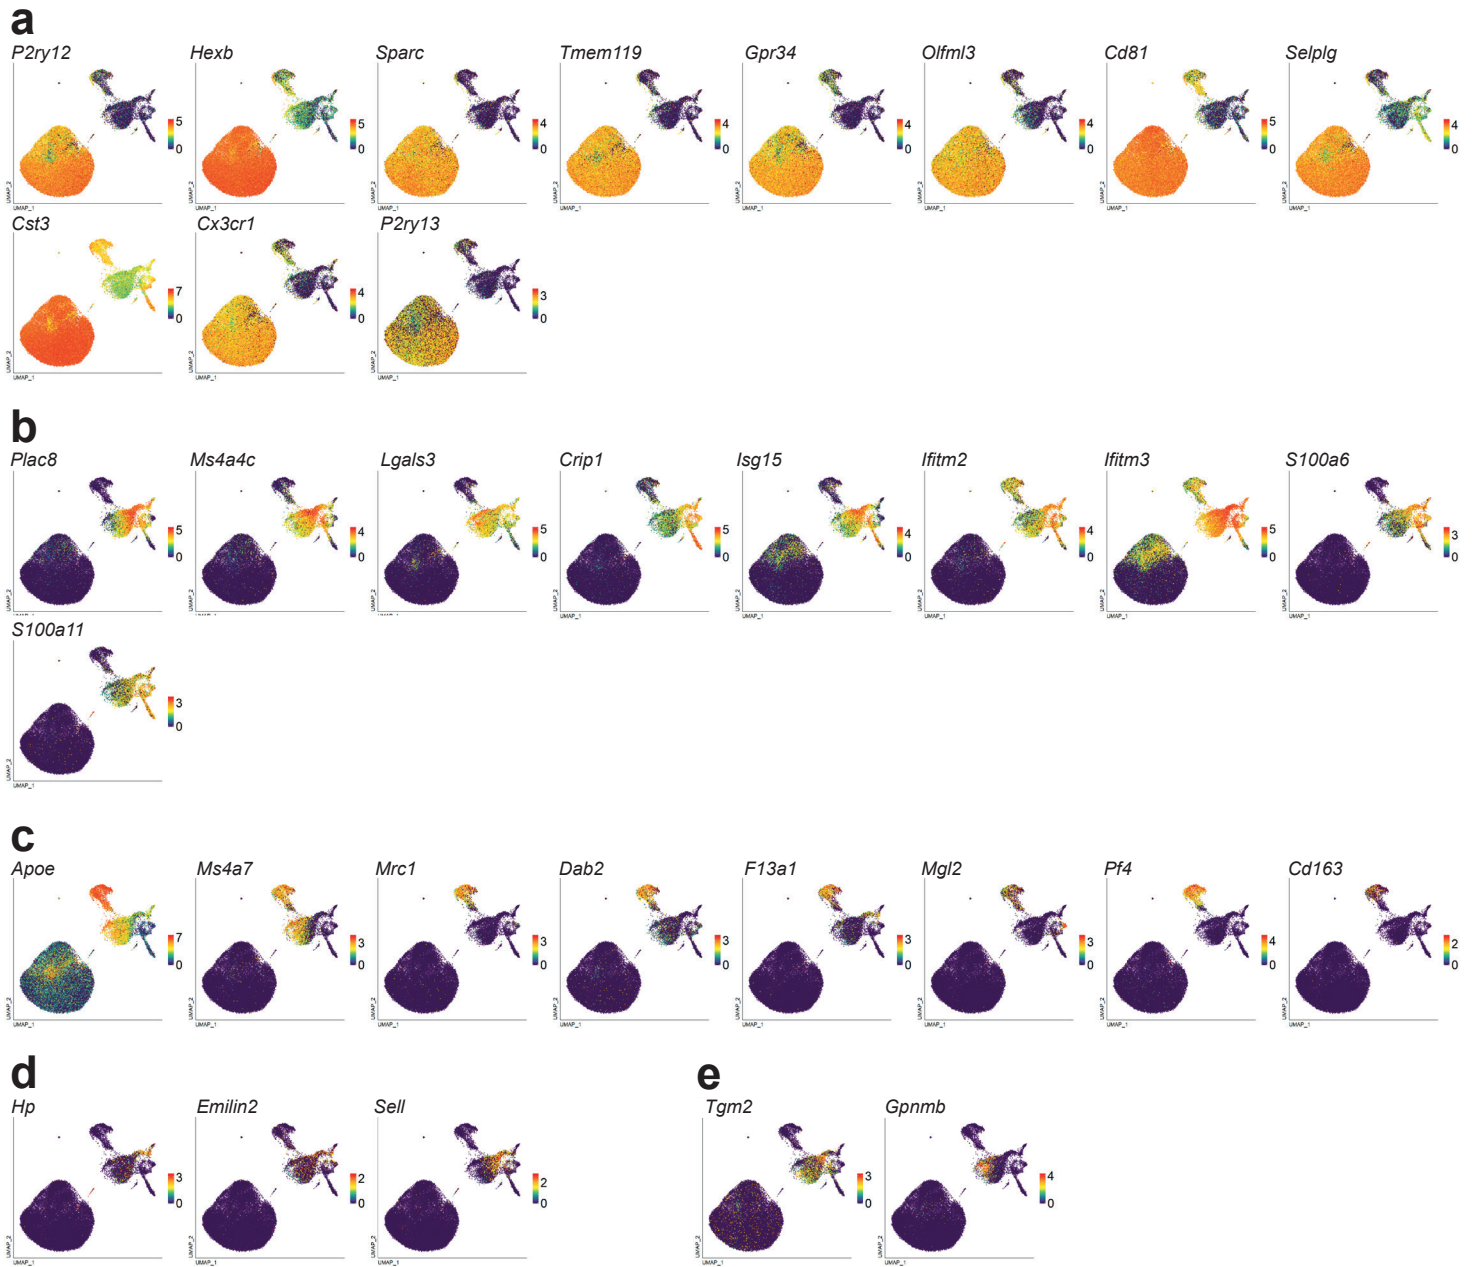

**Supplementary Figure 5. UMAP plots demonstrating the distribution of gene expression level for genes (a) highly expressed by microglia, (b) highly expressed by macrophages, (c) highly expressed by CNS Border Associated Macrophages (BAM), (d) proposed as markers of monocytes/macrophages infiltrating glioma TME by Haage et al. (2019)<sup>11</sup>, (e) proposed as markers of Glioma Associated Macrophages (GAM) by Walentynowicz et al. (2018)<sup>10</sup>.**

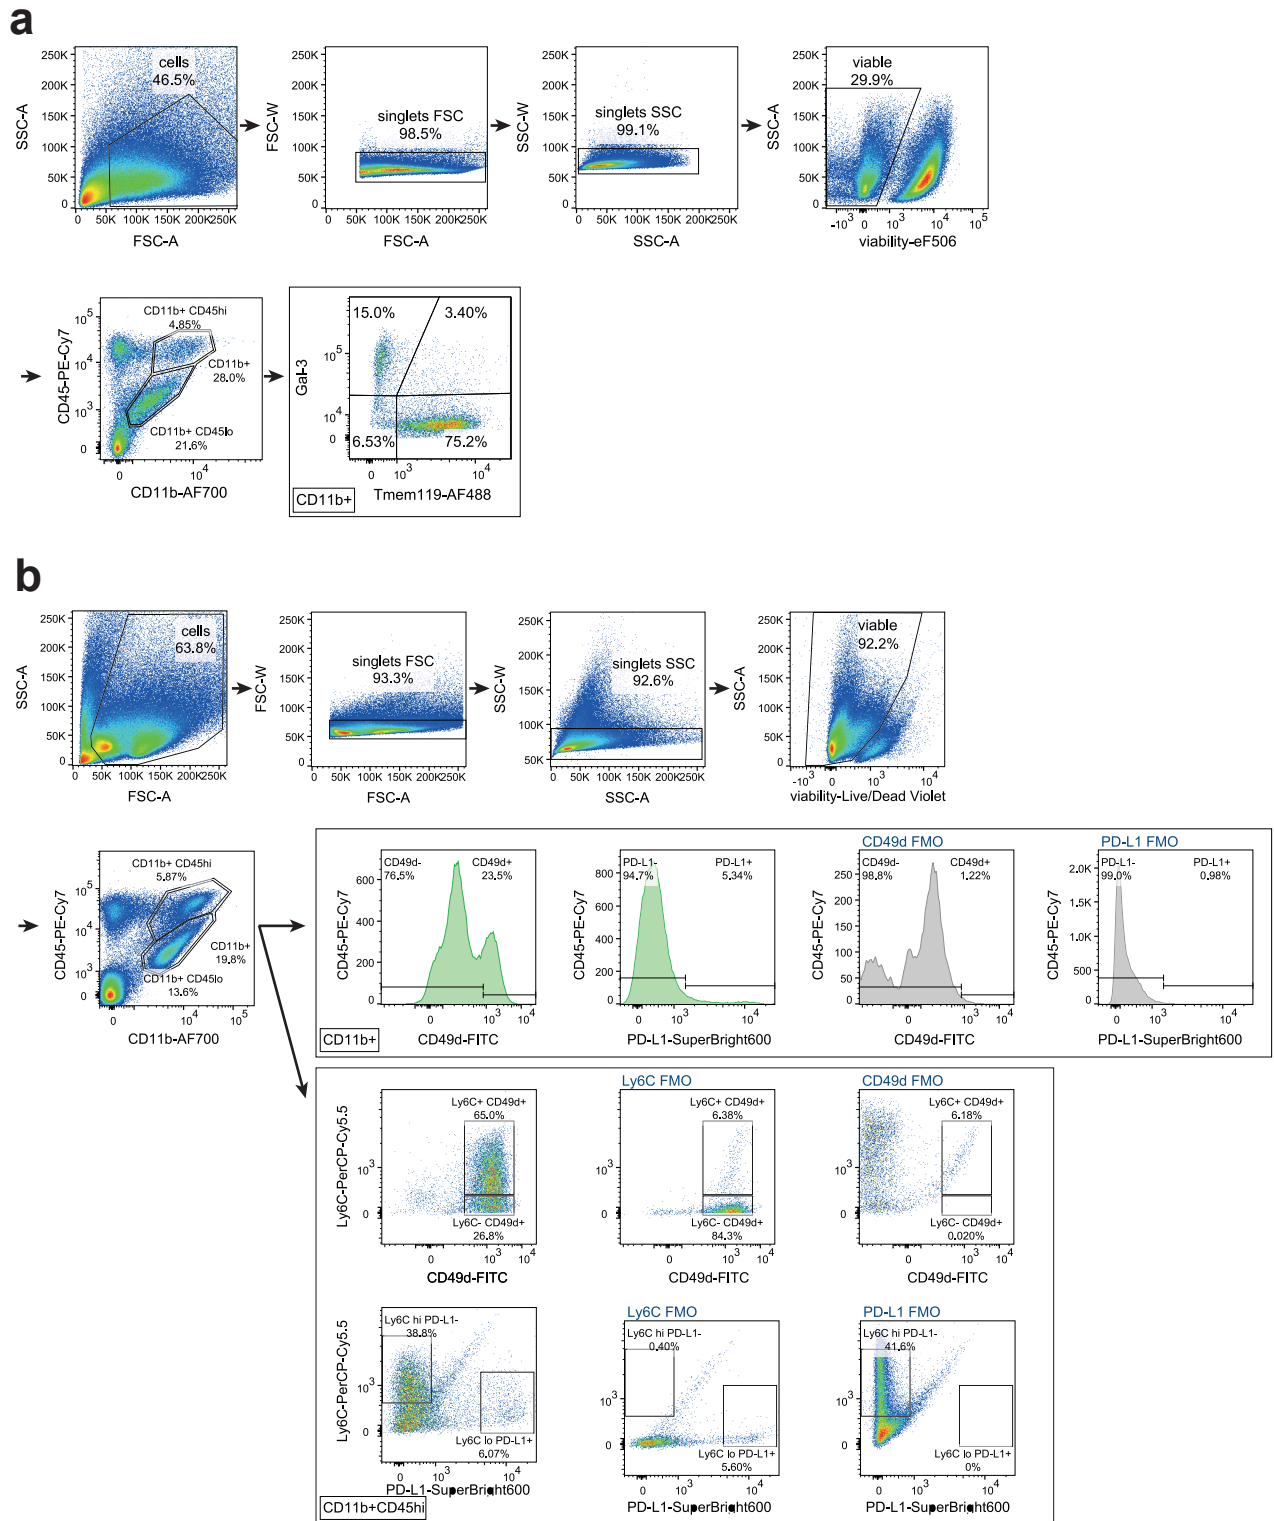

### Supplementary Figure 6. Gating strategy for flow cytometry analysis.

**(a)** Gating for Tmem119 and Gal-3 presented on Figure 2e. **(b)** Gating for CD49d, PD-L1 and Ly6C presented on Figure 2h,i. Events corresponding to cells were gated on SSC-A vs FSC-A plots, then doublets were excluded. Events in singlets gate were further analyzed for the uptake of Fixable Viability Dye (a) or LiveDead Violet dye (b) to exclude events corresponding to dead or damaged cells. For the gating of Tmem119+ and Gal-3+ events (a), gates were set on CD11b+ events. For CD49d+ and PD-L1+ events (b), gates were set on CD11b+ events, and for Ly6C vs CD49d and Ly6C vs PD-L1 analysis (b), gates were set on CD11b+CD45hi events. Gates were set based on backgating strategy or FMO controls. Tissues were dissociated enzymatically with DNase I (a) or papain-based enzyme mix (b) with simultaneous mechanical processing.

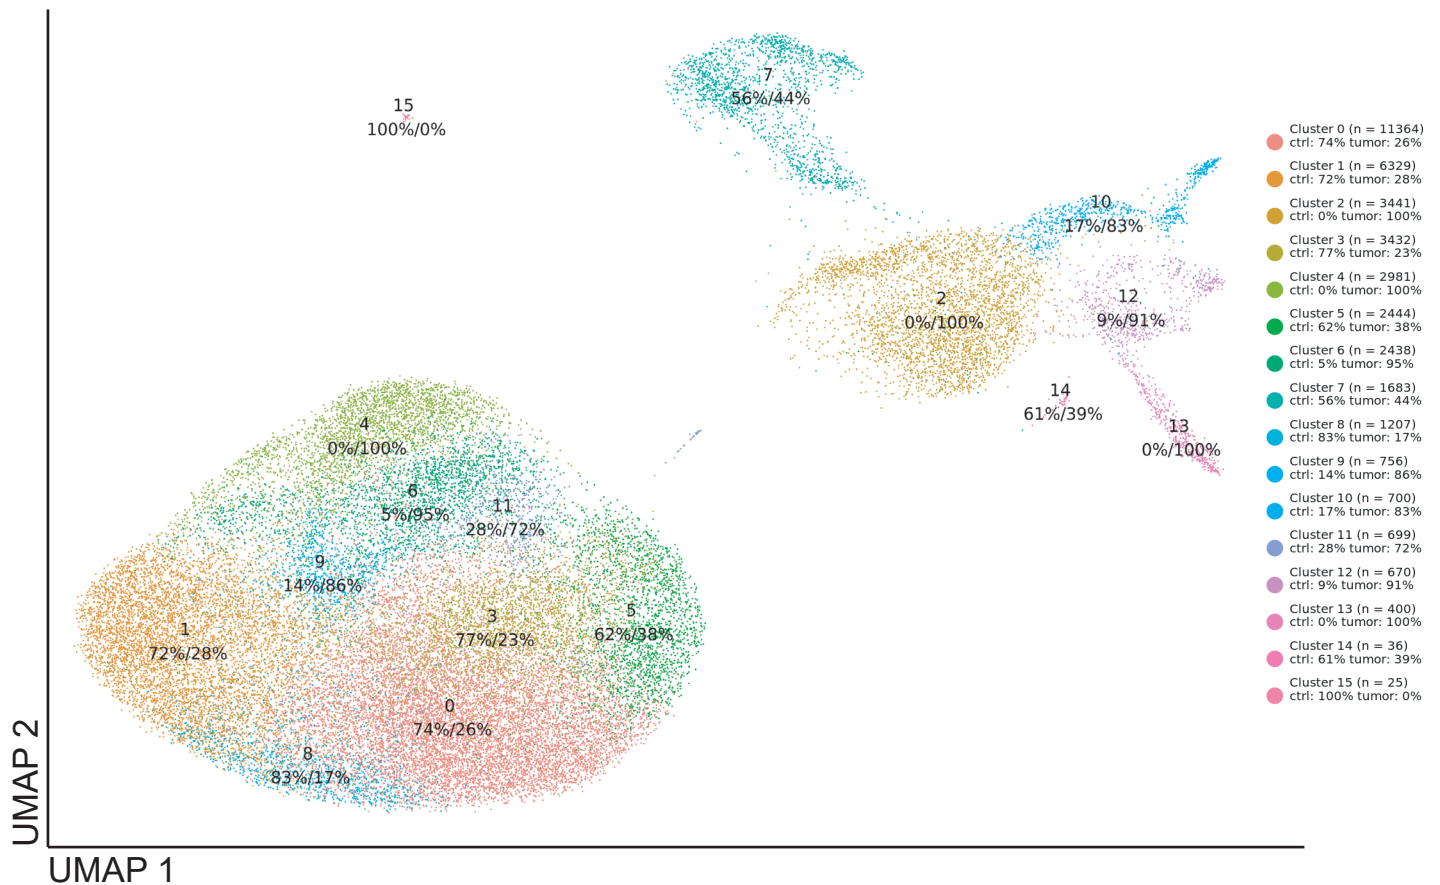

### Supplementary Figure 7. Clustering of cells identified as Microglia, Monocytes/Macrophages and BAMs from all conditions.

Results of unsupervised clustering of cells from three subpopulations of interest (corresponding to Figure 2a) from all 8 samples, visualized on UMAP plot. Clusters are marked with different colors and number of cells assigned to each cluster (n) is depicted in the legend. The shown percentages correspond to fractions of cells originating from control and tumor samples respectively.

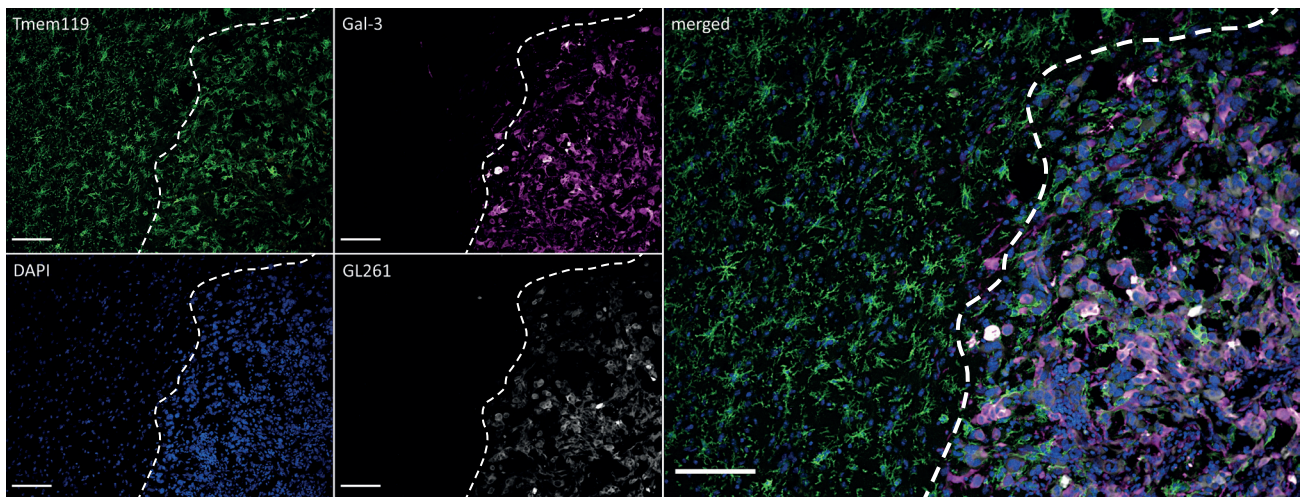

**Supplementary Figure 8. Localization of Tmem119+ and Gal-3+ cells in the tumor area**  
 Immunohistochemical staining for microglia (Tmem119+) and Mo/MΦ (Gal-3+) shows the localization of specific immune cells within the tumor and its surroundings in male animal (for female see Figure 3d); a dashed line marks the tumor edge; scale – 100 μm; the staining was performed for 3 animals, 4 sections each, only representative image is shown.

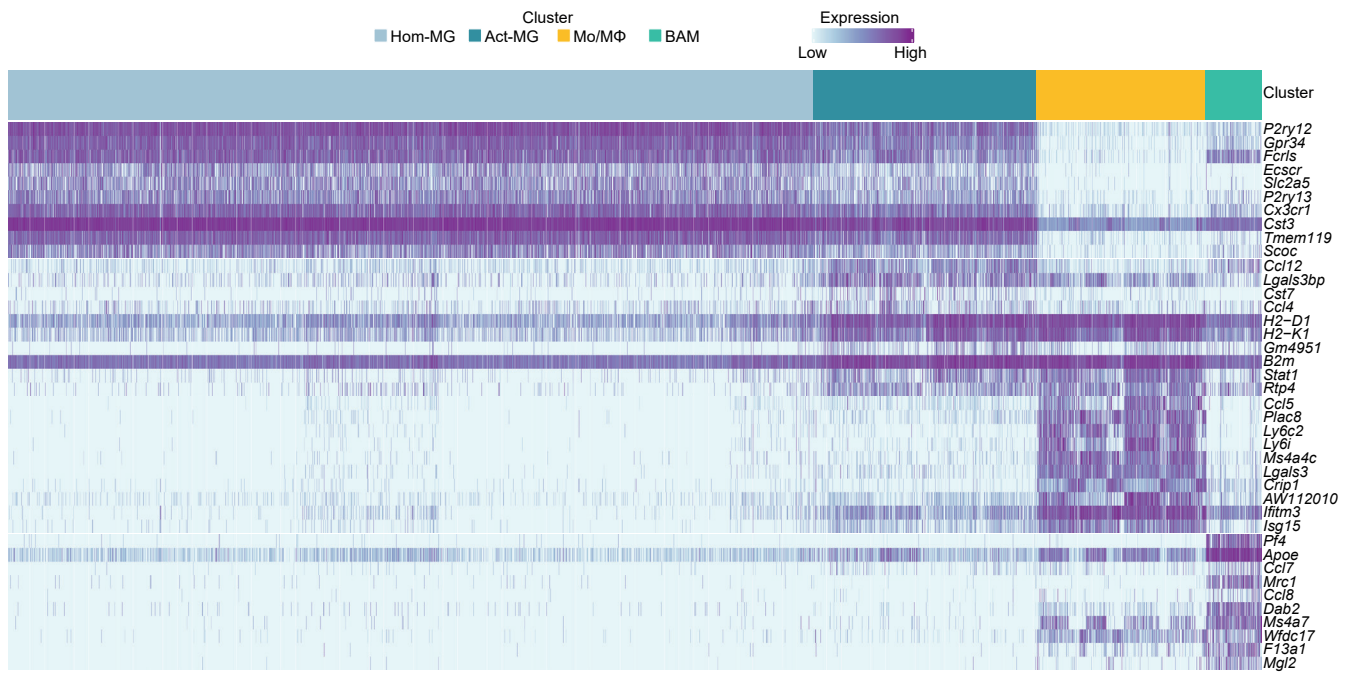

### Supplementary Figure 9. Top differentially expressed genes

Heatmap demonstrating top 10 differentially expressed genes in Hom-MG, Act-MG, Mo/MΦ and BAMs (clusters corresponding to Figure 4a).

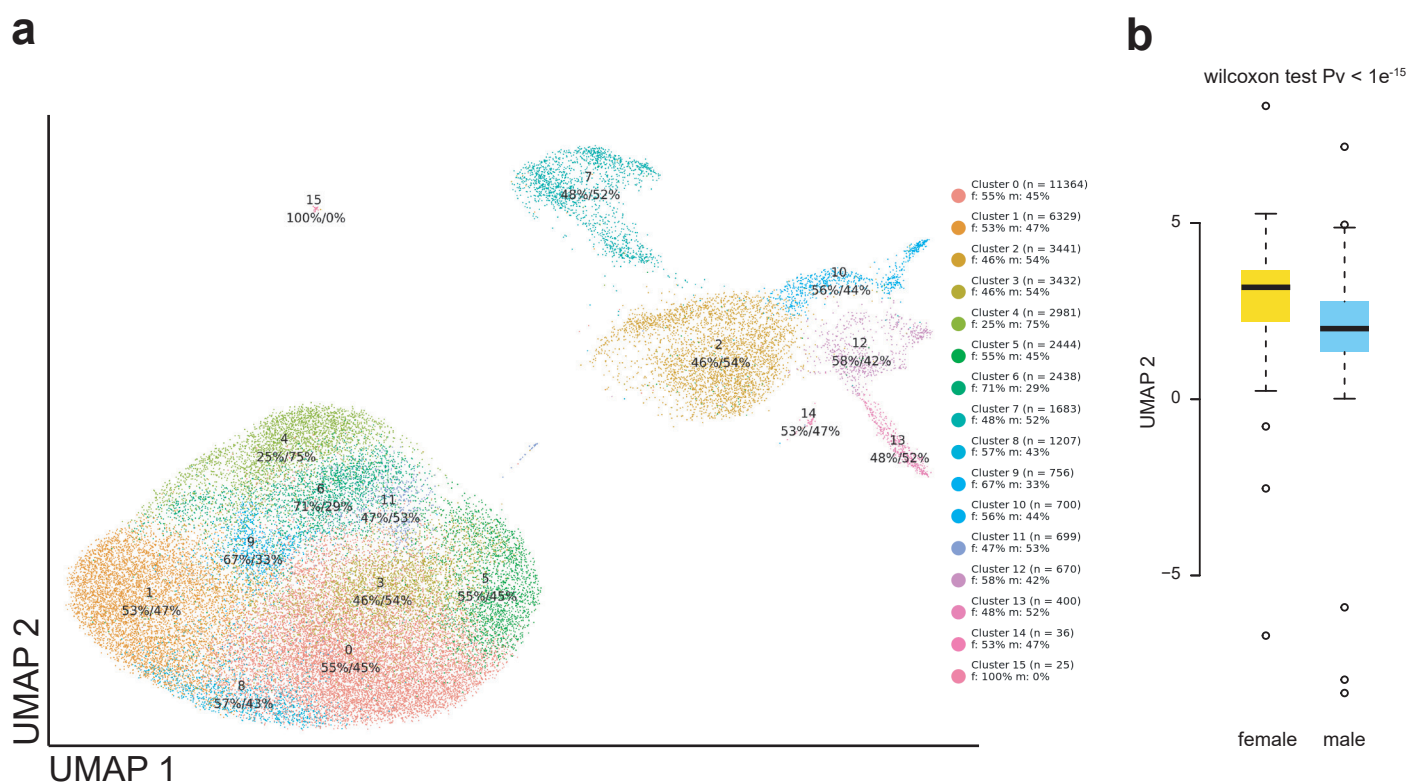

### Supplementary Figure 10. Sex-driven cell grouping within the intMoMΦ subpopulation

**(a)** Results of unsupervised clustering of cells from three subpopulations of interest (corresponding to Figure 2a) from all 8 samples, visualized on UMAP plot. Clusters are marked with different colors and number of cells assigned to each cluster ( $n$ ) is depicted in the legend. The shown percentages correspond to fractions of cells originating from female and male samples respectively. **(b)** Comparison of UMAP 2 values for cells originating from female and male samples in cluster #2 identified as intermediate Monocyte-Macrophage cells - intMo/MΦ. Two-sided wilcoxon test, the lower and upper hinges of the boxplots correspond to 25th and 75th percentile, whiskers range from -1.5 IQR to 1.5 IQR and a bar in the center of the box represents a median value, outliers are presented as single points,  $n=1869$  cells for male and  $n=1572$  cells for female.

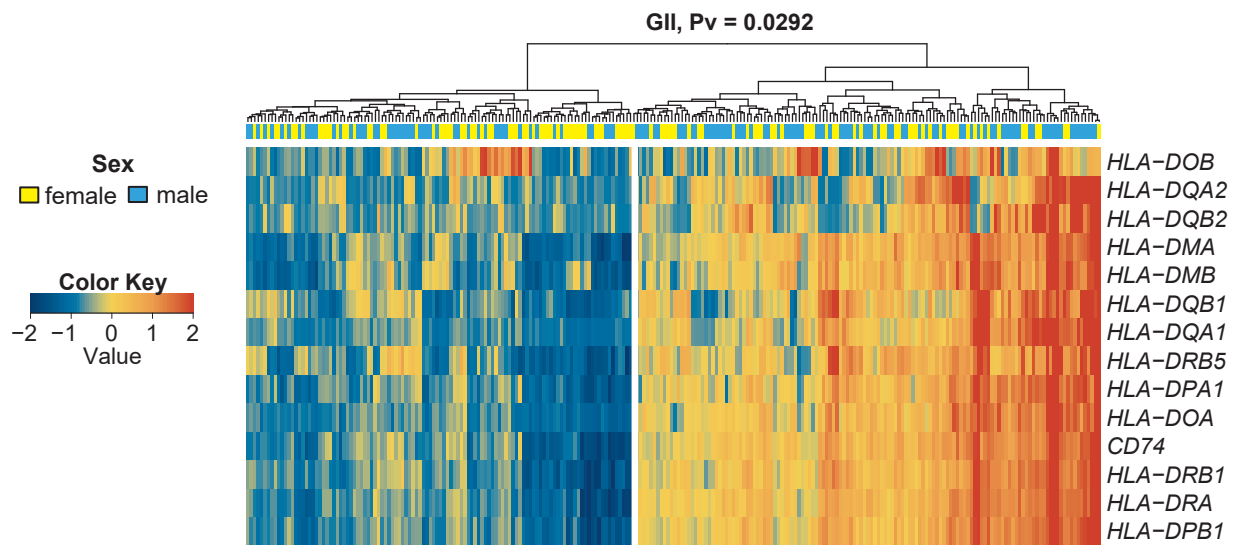

**Supplementary Figure 11. *Cd74* and MHCII genes expression across male and female grade II glioma patients**

Normalized log<sub>2</sub> RNA-seq counts for MHCII complex genes from TCGA WHO grade II glioma patients' data set shows significant differences between male and female glioma patients (two-sided Fisher's exact test).

**Supplementary Table 1.** List of literature-based markers used to create an immune marker panel for characterization of cell identity of obtained clusters (Figure 1b,c).

| Gene           | Target group                 | Ref.  | Gene              | Target group                                 | Ref.  |
|----------------|------------------------------|-------|-------------------|----------------------------------------------|-------|
| <i>Ptprc</i>   | hematopoietic cells          | 1     | <i>F13a1</i>      | macrophages                                  | 8     |
| <i>Itgam</i>   | myeloid cells                | 1     | <i>Fpr3</i>       | macrophages                                  | 9     |
| <i>Cd14</i>    | myelomonocytic cells         | 1     | <i>Kynu</i>       | macrophages                                  | 9     |
| <i>Tmem119</i> | microglia                    | 2,3,4 | <i>S100a11</i>    | macrophages                                  | 9     |
| <i>Cx3cr1</i>  | microglia                    | 2     | <i>S100a6</i>     | macrophages                                  |       |
| <i>P2ry12</i>  | microglia                    | 2,3   | <i>Tgm2</i>       | Glioma Associated Microglia/Macrophages      | 10    |
| <i>P2ry13</i>  | microglia                    | 2,3   | <i>Gpnmb</i>      | Glioma Associated Microglia/Macrophages      | 10    |
| <i>Gpr34</i>   | microglia                    | 2,3   | <i>Emilin2</i>    | macrophages in high-grade glioma environment | 11    |
| <i>Olfml3</i>  | microglia                    | 2     | <i>Gda</i>        | macrophages in high-grade glioma environment | 11    |
| <i>Selp1g</i>  | microglia                    | 2,4   | <i>Hp</i>         | macrophages in high-grade glioma environment | 11    |
| <i>Sparc</i>   | microglia                    | 2     | <i>Sell</i>       | macrophages in high-grade glioma environment | 11    |
| <i>Fcrls</i>   | microglia                    | 2,3   | <i>Cd163</i>      | Border Associated Macrophages                | 12    |
| <i>Siglech</i> | microglia                    | 2     | <i>Mrc1</i>       | Border Associated Macrophages                | 12,13 |
| <i>Slc2a5</i>  | microglia                    | 2,4   | <i>Lyve1</i>      | Border Associated Macrophages                | 12    |
| <i>Pf4</i>     | microglia progenitors        | 5     | <i>Siglec1</i>    | Border Associated Macrophages                | 12    |
| <i>F13a1</i>   | microglia progenitors        | 5     | <i>Ly6c1</i>      | monocytes                                    | 14    |
| <i>Lyz2</i>    | microglia progenitors        | 5     | <i>Ly6c2</i>      | monocytes                                    | 14    |
| <i>Ifit3</i>   | microglia progenitors        | 5     | <i>Ccr2</i>       | classical monocytes                          | 14,15 |
| <i>Mcm5</i>    | early microglia              | 5     | <i>Spn (CD43)</i> | non-classical monocytes                      | 14    |
| <i>Dab2</i>    | early microglia              | 5     | <i>Ly6g</i>       | Granulocytes                                 | 16    |
| <i>Cxcr2</i>   | pre-microglia                | 5     | <i>Cd24a</i>      | granulocytes/ dendritic cells                | 16    |
| <i>Scd2</i>    | pre-microglia                | 5     | <i>Itgax</i>      | dendritic cells                              | 17    |
| <i>Psat1</i>   | pre-microglia                | 5     | <i>Bst2</i>       | plasmacytoid dendritic cells                 | 17    |
| <i>Csf1</i>    | pre-microglia                | 5     | <i>Ncam1</i>      | NK cells                                     | 18    |
| <i>Crybb1</i>  | pre-microglia                | 5     | <i>Klrb1c</i>     | NK cells                                     | 18    |
| <i>Fcrls</i>   | pre-microglia                | 5     | <i>Klrk1</i>      | NK cells                                     | 18    |
| <i>Selp1g</i>  | adult microglia              | 5     | <i>Ncr1</i>       | NK cells                                     | 18    |
| <i>Matb</i>    | adult microglia              | 5     | <i>Cd2</i>        | T-cells, NK cells                            | 1     |
| <i>Pmepa1</i>  | adult microglia              | 5     | <i>Cd3d</i>       | T cells                                      | 1     |
| <i>Cd14</i>    | adult microglia              | 5     | <i>Cd3e</i>       | T cells                                      | 1     |
| <i>Lpl</i>     | disease associated microglia | 6     | <i>Cd3g</i>       | T cells                                      | 1     |
| <i>Cst7</i>    | disease associated microglia | 4,6   | <i>Cd4</i>        | helper T cell                                | 1     |
| <i>Itga4</i>   | macrophages                  | 7,9   | <i>Cd8a</i>       | cytotoxic T cells                            | 1     |
| <i>Tgfb1</i>   | macrophages                  | 8,9   | <i>Cd8b1</i>      | cytotoxic T cells                            | 1     |
| <i>Ifitm2</i>  | macrophages                  | 8,9   | <i>Cd19</i>       | B-cells                                      | 1     |
| <i>Ifitm3</i>  | macrophages                  | 8     | <i>Ms4a1</i>      | B-cells                                      | 1     |
| <i>Tagln2</i>  | macrophages                  | 8     | <i>Sdc1</i>       | B-cells                                      | 1     |

**Supplementary Table 2.** Number of identified cells, reads per cell and obtained saturation as well as analyzed cells and genes after filtration for each replicate.

|                                                  | female          |                 |               |               | male            |                 |               |               |        |        |
|--------------------------------------------------|-----------------|-----------------|---------------|---------------|-----------------|-----------------|---------------|---------------|--------|--------|
|                                                  | control<br>rep1 | control<br>rep2 | tumor<br>rep1 | tumor<br>rep2 | control<br>rep1 | control<br>rep2 | tumor<br>rep1 | tumor<br>rep2 | mean   | sum    |
| number of identified<br>cells                    | 5 223           | 4 870           | 5 802         | 5 579         | 4 873           | 5 301           | 4 402         | 5 009         | 5 150  | 41 059 |
| number of reads per<br>cell                      | 42 512          | 33 630          | 31 190        | 31 680        | 35 228          | 37 195          | 43 450        | 31 842        | 36 412 |        |
| saturation                                       | 90.1            | 87.0            | 83.8          | 84.7          | 88.6            | 89.5            | 86.2          | 84.9          | 87     |        |
| number of cells<br>remaining after<br>filtration | 5 167           | 4 787           | 5 654         | 5 491         | 4 820           | 5 239           | 4 306         | 4 937         | 5 066  | 40 401 |
| number of genes<br>remaining after<br>filtration | 12 520          | 12 720          | 13 424        | 13 192        | 12 636          | 12 781          | 12 978        | 13 030        |        |        |

**Supplementary Table 3.** The list of genes described as having important role in immune cells and involved in cell cycle regulation used to facilitate cell type identification.

|                 |                |                |                 |                 |                 |                |
|-----------------|----------------|----------------|-----------------|-----------------|-----------------|----------------|
| <i>Anln</i>     | <i>Cd27</i>    | <i>Cxcl12</i>  | <i>H2-Ea-ps</i> | <i>Itgb7</i>    | <i>P2ry13</i>   | <i>Timp2</i>   |
| <i>Anp32e</i>   | <i>Cd274</i>   | <i>Cxcl16</i>  | <i>H2-Eb1</i>   | <i>Jun</i>      | <i>Pcna</i>     | <i>Tipin</i>   |
| <i>Anxa1</i>    | <i>Cd34</i>    | <i>Cxcl2</i>   | <i>H2-K1</i>    | <i>Junb</i>     | <i>Pf4</i>      | <i>Tlr7</i>    |
| <i>Anxa5</i>    | <i>Cd38</i>    | <i>Cxcl9</i>   | <i>H2-Q7</i>    | <i>Jund</i>     | <i>Plac8</i>    | <i>Tlr9</i>    |
| <i>Apoe</i>     | <i>Cd3d</i>    | <i>Cxcr2</i>   | <i>H2-T23</i>   | <i>Kif11</i>    | <i>Pmepa1</i>   | <i>Tmem119</i> |
| <i>Arg1</i>     | <i>Cd3e</i>    | <i>Cybb</i>    | <i>H2afv</i>    | <i>Kif20b</i>   | <i>Pola1</i>    | <i>Tmem123</i> |
| <i>Ass1</i>     | <i>Cd3g</i>    | <i>Cycs</i>    | <i>H2afy</i>    | <i>Kif23</i>    | <i>Pold3</i>    | <i>Tmpo</i>    |
| <i>Atad2</i>    | <i>Cd4</i>     | <i>Dab2</i>    | <i>H2afy2</i>   | <i>Kif2c</i>    | <i>Prim1</i>    | <i>Tnf</i>     |
| <i>Aurka</i>    | <i>Cd40</i>    | <i>Dlgap5</i>  | <i>H2afz</i>    | <i>Kit</i>      | <i>Pros1</i>    | <i>Top2a</i>   |
| <i>Aurkb</i>    | <i>Cd52</i>    | <i>Dscc1</i>   | <i>H3f3a</i>    | <i>Klf2</i>     | <i>Psat1</i>    | <i>Tpx2</i>    |
| <i>Basp1</i>    | <i>Cd63</i>    | <i>Dtl</i>     | <i>H3f3b</i>    | <i>Klf4</i>     | <i>Psrc1</i>    | <i>Trafd1</i>  |
| <i>Bhlhe41</i>  | <i>Cd72</i>    | <i>Dusp1</i>   | <i>Hells</i>    | <i>Klf6</i>     | <i>Ptpcr</i>    | <i>Trem2</i>   |
| <i>Birc5</i>    | <i>Cd74</i>    | <i>Dusp2</i>   | <i>Hjurp</i>    | <i>Klrb1c</i>   | <i>Rad51</i>    | <i>Ttk</i>     |
| <i>Blm</i>      | <i>Cd81</i>    | <i>Dusp3</i>   | <i>Hmgb2</i>    | <i>Klrk1</i>    | <i>Rad51ap1</i> | <i>Tubb4b</i>  |
| <i>Bmp2k</i>    | <i>Cd8a</i>    | <i>Dusp5</i>   | <i>Hmmr</i>     | <i>Lbr</i>      | <i>Rangap1</i>  | <i>Tyms</i>    |
| <i>Brip1</i>    | <i>Cd8b1</i>   | <i>Dusp6</i>   | <i>Hp</i>       | <i>Lgals3bp</i> | <i>Relb</i>     | <i>Ube2c</i>   |
| <i>Bst2</i>     | <i>Cd9</i>     | <i>E2f8</i>    | <i>Ier5</i>     | <i>Lpl</i>      | <i>Rfc2</i>     | <i>Ubr7</i>    |
| <i>Bub1</i>     | <i>Cdc20</i>   | <i>Ecscr</i>   | <i>Ifi205</i>   | <i>Ly6c1</i>    | <i>Rnh1</i>     | <i>Uhrf1</i>   |
| <i>Casp8ap2</i> | <i>Cdc25c</i>  | <i>Ect2</i>    | <i>Ifit3</i>    | <i>Ly6c2</i>    | <i>Rpa2</i>     | <i>Ung</i>     |
| <i>Cbx5</i>     | <i>Cdc45</i>   | <i>Egr1</i>    | <i>Ifitm2</i>   | <i>Ly6g</i>     | <i>Rrm1</i>     | <i>Usp1</i>    |
| <i>Ccl12</i>    | <i>Cdc6</i>    | <i>Emilin2</i> | <i>Ifitm3</i>   | <i>Ly6i</i>     | <i>Rrm2</i>     | <i>Wdr76</i>   |
| <i>Ccl17</i>    | <i>Cdca2</i>   | <i>Exo1</i>    | <i>Il10</i>     | <i>Lyz1</i>     | <i>S100a11</i>  | <i>Xaf1</i>    |
| <i>Ccl2</i>     | <i>Cdca3</i>   | <i>F13a1</i>   | <i>Il10rb</i>   | <i>Mafb</i>     | <i>S100a4</i>   | <i>Zbp1</i>    |
| <i>Ccl22</i>    | <i>Cdca7</i>   | <i>Fcer1a</i>  | <i>Il12a</i>    | <i>Mcm2</i>     | <i>S100a6</i>   | <i>Zfhx3</i>   |
| <i>Ccl24</i>    | <i>Cdca8</i>   | <i>Fcrls</i>   | <i>Il12b</i>    | <i>Mcm4</i>     | <i>Sall1</i>    | <i>Zfp691</i>  |
| <i>Ccl3</i>     | <i>Cdk1</i>    | <i>Fen1</i>    | <i>Il13ra1</i>  | <i>Mcm5</i>     | <i>Samhd1</i>   |                |
| <i>Ccl4</i>     | <i>Ceacam1</i> | <i>Fgr</i>     | <i>Il15</i>     | <i>Mcm6</i>     | <i>Scd2</i>     |                |
| <i>Ccl5</i>     | <i>Ceacam3</i> | <i>Flt3</i>    | <i>Il17ra</i>   | <i>Mef2c</i>    | <i>Sdc1</i>     |                |
| <i>Ccl6</i>     | <i>Cebpa</i>   | <i>Fos</i>     | <i>Il18</i>     | <i>Mki67</i>    | <i>Sell</i>     |                |
| <i>Ccl7</i>     | <i>Cebpd</i>   | <i>Fosb</i>    | <i>Il18bp</i>   | <i>Mndal</i>    | <i>Selplg</i>   |                |
| <i>Ccl8</i>     | <i>Cenpa</i>   | <i>G2e3</i>    | <i>Il1a</i>     | <i>Mrc1</i>     | <i>Siglecf</i>  |                |
| <i>Ccl9</i>     | <i>Cenpe</i>   | <i>Gas2l3</i>  | <i>Il1b</i>     | <i>Ms4a1</i>    | <i>Siglech</i>  |                |
| <i>Ccnb2</i>    | <i>Cenpf</i>   | <i>Gas6</i>    | <i>Il1rn</i>    | <i>Msh2</i>     | <i>Slamf7</i>   |                |
| <i>Ccne2</i>    | <i>Chaf1b</i>  | <i>Gbp2</i>    | <i>Il2</i>      | <i>Nampt</i>    | <i>Slbp</i>     |                |
| <i>Ccr1</i>     | <i>Ckap2</i>   | <i>Gbp5</i>    | <i>Il2rb</i>    | <i>Nasp</i>     | <i>Slc2a5</i>   |                |
| <i>Ccr2</i>     | <i>Ckap2l</i>  | <i>Gda</i>     | <i>Il2rg</i>    | <i>Ncam1</i>    | <i>Slc39a1</i>  |                |
| <i>Ccr3</i>     | <i>Ckap5</i>   | <i>Gins2</i>   | <i>Il3ra</i>    | <i>Ncapd2</i>   | <i>Smc4</i>     |                |
| <i>Ccr7</i>     | <i>Cks1b</i>   | <i>Gmn</i>     | <i>Il4i1</i>    | <i>Ncoa3</i>    | <i>Socs1</i>    |                |
| <i>Ccl2</i>     | <i>Cks2</i>    | <i>Gpnm</i>    | <i>Il5ra</i>    | <i>Ncr1</i>     | <i>Socs2</i>    |                |
| <i>Cd14</i>     | <i>Clspn</i>   | <i>Gpr141</i>  | <i>Il6</i>      | <i>Ndc80</i>    | <i>Socs3</i>    |                |
| <i>Cd163</i>    | <i>Crybb1</i>  | <i>Gpr34</i>   | <i>Il6ra</i>    | <i>Nek2</i>     | <i>Sparc</i>    |                |
| <i>Cd180</i>    | <i>Csf1</i>    | <i>Gtse1</i>   | <i>Irf7</i>     | <i>Nfia</i>     | <i>Spp1</i>     |                |
| <i>Cd19</i>     | <i>Cst3</i>    | <i>H1f0</i>    | <i>Irf8</i>     | <i>Nfkb1a</i>   | <i>Tacc3</i>    |                |
| <i>Cd2</i>      | <i>Cst7</i>    | <i>H1fx</i>    | <i>Itga2</i>    | <i>Notch1</i>   | <i>Tagln2</i>   |                |
| <i>Cd200</i>    | <i>Cstb</i>    | <i>H2-Aa</i>   | <i>Itga2b</i>   | <i>Npc2</i>     | <i>Tgfb1</i>    |                |
| <i>Cd200r4</i>  | <i>Ctcf</i>    | <i>H2-Ab1</i>  | <i>Itga4</i>    | <i>Nuf2</i>     | <i>Tgfbr1</i>   |                |
| <i>Cd209a</i>   | <i>Cx3cr1</i>  | <i>H2-D1</i>   | <i>Itgam</i>    | <i>Nusap1</i>   | <i>Tgm2</i>     |                |
| <i>Cd24a</i>    | <i>Cxcl10</i>  | <i>H2-DMA</i>  | <i>Itgax</i>    | <i>P2ry12</i>   | <i>Thy1</i>     |                |

**Supplementary Table 4.** Specifications, catalog numbers and dilutions of reagents used for immunohistochemistry and flow cytometry.

| Reagent                                    | Manufacturer     | Cat. number | Clone  | Fluorophore           | Application | Dilution             | Lot number  |
|--------------------------------------------|------------------|-------------|--------|-----------------------|-------------|----------------------|-------------|
| LiveDead Fixable Violet Dead Cell Stain    | ThermoFisher     | L34955      | -      | -                     | FC          | 1:1000               | 1910200     |
| Fixable Viability Dye eF506                | eBioscience      | 65-0866     | -      | -                     | FC          | 1:1000               | 2198947     |
| Stain Buffer                               | BD Pharmingen    | 554656      | -      | -                     | FC          | -                    | 9329560     |
| Foxp3 Transcription Factor Staining Buffer | eBioscience      | 00-5523-00  | -      | -                     | FC          | -                    | 2171417     |
| anti-mouse CD16/CD32 Fc Block              | BD Pharmingen    | 553142      | -      | -                     | FC          | 1:250                | 8130843     |
| anti-CD45 mAb                              | BD Pharmingen    | 561868      | 30-F11 | PE-Cy7                | FC          | 1:800                | 8205729     |
| anti-CD11b mAb                             | BD Pharmingen    | 557960      | M1/70  | Alexa Fluor 700       | FC          | 1:800                | 7180930     |
| anti-CD11b mAb                             | BD Pharmingen    | 553310      | M1/70  | FITC                  | FACS        | 1:800                | 8295813     |
| anti-Ly6C mAb                              | BD Pharmingen    | 560525      | AL-21  | PerCP-Cy5.5           | FC          | 1:100                | 9325105     |
| anti-CD49d mAb                             | BioLegend        | 103605      | R1-2   | FITC                  | FC          | 1:400                | B239209     |
| anti-PD-L1 mAb                             | ThermoFisher     | 63-5982-82  | MIH5   | SuperBright600        | FC          | 1:100                | E113345     |
| anti-Tmem119 mAb                           | Abcam            | ab210405    | 106-6  | unconjugated (rabbit) | FC          | 1:400                | GR3208844-1 |
| anti-rabbit Alexa Fluor 488 pAb            | Abcam            | ab150077    | -      | Alexa Fluor 488       | FC          | 1:1000               | GR3203087-1 |
| anti-Gal-3 mAb                             | BioLegend        | 125408      | M3/38  | Alexa Fluor 647       | FC, IF      | 1:200 FC<br>1:100 IF | B255908     |
| anti-TMEM119 pAb                           | Synaptic Systems | 400002      | -      | -                     | IF          | 1:500                |             |
| anti-rabbit Alexa Fluor 488 pAb            | Invitrogen       | A21206      | -      | Alexa Fluor 488       | IF          | 1:1000               | 1874771     |

## Supplementary References

1. Murphy, K., Janeway, Charles Alderson, J., Travers, P. & Walport, M. J. S. *Janeway's Immunobiology*. (New York : Garland Science, 2012).
2. Sousa, C., Biber, K. & Michelucci, A. Cellular and molecular characterization of microglia: A unique immune cell population. *Front. Immunol.* **8**, (2017).
3. Bennett, M. L. *et al.* New tools for studying microglia in the mouse and human CNS. *Proc. Natl. Acad. Sci. U. S. A.* **113**, E1738–E1746 (2016).
4. Masuda, T. *et al.* Spatial and temporal heterogeneity of mouse and human microglia at single-cell resolution. *Nature* **566**, 388–392 (2019).
5. Matcovitch-Natan, O. *et al.* Microglia development follows a stepwise program to regulate brain homeostasis. *Science* **353**, (2016).
6. Keren-Shaul, H. *et al.* A Unique Microglia Type Associated with Restricting Development of Alzheimer's Disease. *Cell* **169**, 1276–1290.e17 (2017).
7. Bowman, R. L. *et al.* Macrophage Ontogeny Underlies Differences in Tumor-Specific Education in Brain Malignancies. *Cell Rep.* **17**, 2445–2459 (2016).
8. Venteicher, A. S. *et al.* Decoupling genetics, lineages, and microenvironment in IDH-mutant gliomas by single-cell RNA-seq. *Science* **355**, (2017).
9. Müller, S. *et al.* Single-cell profiling of human gliomas reveals macrophage ontogeny as a basis for regional differences in macrophage activation in the tumor microenvironment. *Genome Biol.* **18**, (2017)
10. Walentynowicz, K. A. *et al.* In search for reliable markers of glioma-induced polarization of microglia. *Front. Immunol.* **9**, 1–13 (2018).
11. Haage, V. *et al.* Comprehensive gene expression meta-analysis identifies signature genes that distinguish microglia from peripheral monocytes/macrophages in health and glioma. *Acta Neuropathol. Commun.* **7**, (2019).
12. Jordão, M. J. C. *et al.* Neuroimmunology: Single-cell profiling identifies myeloid cell subsets with distinct fates during neuroinflammation. *Science* **363**, (2019).
13. Goldmann, T. *et al.* Origin, fate and dynamics of macrophages at central nervous system interfaces. *Nat. Immunol.* **17**, 797–805 (2016).
14. Ziegler-Heitbrock, L. *et al.* Nomenclature of monocytes and dendritic cells in blood. *Blood* **116** (2010).
15. Thomas, G. D. *et al.* Human Blood Monocyte Subsets: A New Gating Strategy Defined Using Cell Surface Markers Identified by Mass Cytometry. *Arterioscler. Thromb. Vasc. Biol.* **37**, 1548–1558 (2017).
16. Fleming, T. J., Fleming, M. L. & Malek, T. R. Selective expression of Ly-6G on myeloid lineage cells in mouse bone marrow. RB6-8C5 mAb to granulocyte-differentiation antigen (Gr-1) detects members of the Ly-6 family. *J. Immunol.* **151**, 2399–408 (1993).
17. Musumeci, A., Lutz, K., Winheim, E. & Krug, A. B. What makes a PDC: Recent advances in understanding plasmacytoid DC development and heterogeneity. *Front. Immunol.* **10** (2019).
18. Crinier, A. *et al.* High-Dimensional Single-Cell Analysis Identifies Organ-Specific Signatures and Conserved NK Cell Subsets in Humans and Mice. *Immunity* **49**, 971–986.e5 (2018).
